# Supplementary material for: Computer Game Play Reduces Intrusive Memories of Experimental Trauma via Reconsolidation-Update Mechanisms
Source: PubMed Central journal article supplement (PMC4526368; doi:10.1177/0956797615583071), 2015-08
Supplement: DS_10.11770956797615583071_OpenPracticesDisclosure.pdf [file DS_10.11770956797615583071_OpenPracticesDisclosure.pdf]

DOI: 10.1177/0956797615583071

[The above details are stated in our Open Science Framework document, '21 Copyright and restricted access materials': [osf.io/tgxy4](https://osf.io/tgxy4)].

The following have restricted access and cannot be uploaded to the Open Science Framework:

**Trauma film.** We are not permitted to distribute the trauma film to third parties. We are happy to provide details of the film segments to an interested reader upon request.

**Tetris computer game.** We are not permitted to distribute the commercially licensed computer game Tetris to third parties. The study used Tetris Zone (Blue Planet Software) Version 1.2.1 set to 'Marathon' mode. This version contained a preview of upcoming Tetris blocks which may encourage mental rotation. Also see document uploaded to the Open Science Framework 'Instructions for experimenter Tetris game play' for further information.

**Music filler task: music clips.** We are not permitted to distribute the music clips to third parties. We are happy to provide details of the music segments to an interested reader upon request.

[The above details are stated in the Open Science Framework document, '21 Copyright and restricted access materials': [osf.io/tgxy4](https://osf.io/tgxy4)].

#### DATA:

In the interest of protecting participant confidentiality the following data has been redacted from the databases for Experiments 1 and 2; Socio-demographic information, Age, Gender and Prior trauma history.

[The above details are stated in our Open Science Framework 'Data Code Book' documents for Experiments 1 and 2; [osf.io/gqkjz](https://osf.io/gqkjz) and [osf.io/ij7ea](https://osf.io/ij7ea) respectively].

The final decision to upload this database to the Open Science Framework was taken following consultation with representatives of the UK Medical Research Council and University of Oxford [17/03/2015].

#### Application for Open Data Badge

1. Provide the URL, doi, or other **permanent path** for accessing the data in a **public, open-access repository**:

**Main data for Experiment 1:** [osf.io/gqkjz](https://osf.io/gqkjz)

**Main data for Experiment 2:** [osf.io/ij7ea](https://osf.io/ij7ea)

**Time Series analysis Experiments 1 and 2:** [osf.io/mk72y](https://osf.io/mk72y)

All files listed above can be accessed via the main Project url: [osf.io/ideta](https://osf.io/ideta)

Confirm that there is sufficient information for an independent researcher to reproduce **all of the reported results**,  
 including codebook if relevant.

#### Application for Open Materials Badge

1. Provide the URL, doi, or other **permanent path** for accessing the materials in a **public, open-access repository**:

**Materials:** Experiments 1 and 2: [osf.io/tgxy4](https://osf.io/tgxy4)

The file listed above can be accessed via the main Project url: [osf.io/ideta](https://osf.io/ideta)

Confirm that there is sufficient information for an independent researcher to reproduce **all of the reported methodology**.

**Application for Preregistration Badge**

1. Provide the URL, doi, or other **permanent path** to the registration in a **public, open-access repository**.\*
2. Was the analysis plan registered prior to examination of the data or observing the outcomes? If no, explain.\*\*
3. Were there additional registrations for the study other than the one reported? If yes, provide links and explain.\*
4. Were there any changes to the preregistered analysis plan for the primary confirmatory analysis? If yes, explain.\*\*
5. Are all of the analyses described in the registered plan reported in the article? If no, explain.\*

\*No badge will be awarded if (1) is not provided, **or** if (3) is answered “yes” without strong justification, **or** if (5) is answered “no” without strong justification.

\*\*If the answer to (2) is “no,” the notation DE (Data Exist) will be added to the badge, indicating that registration postdates realization of the outcomes but predates analysis. If the answer to (4) is “yes” with strong justification for changes, the notation TC (Transparent Changes) will be added to the badge, indicating that the analysis plan was altered but the preregistered analyses and rationale for the change are provided.

By signing below, authors affirm that the above information is accurate and complete, that any third-party material has been reproduced or otherwise made available only with the permission of the original author or copyright holder, and that publicly posted data do not contain information that would allow individuals to be identified without consent.

Name: Emily Holmes Date: 27 March 2015
