# Supplementary material for: Computer Game Play Reduces Intrusive Memories of Experimental Trauma via Reconsolidation-Update Mechanisms
Source: PubMed Central journal article supplement (PMC4526368; doi:10.1177/0956797615583071), 2015-08
Supplement: DS_10.11770956797615583071_TableS1.pdf [file DS_10.11770956797615583071_TableS1.pdf]

Table S1

*Experiment 1: Baseline characteristics, manipulation checks and recognition memory scores*

|                               | No-Task<br>Control<br>(n = 26) | Reactivation+<br>Tetris<br>(n = 26) |
|-------------------------------|--------------------------------|-------------------------------------|
|                               | <i>n</i><br>(%)                | <i>n</i><br>(%)                     |
| Female                        | 18<br>(69.23)                  | 13<br>(50.00)                       |
|                               | <i>M</i><br>[95% CI]           | <i>M</i><br>[95% CI]                |
| Age                           | 24.85<br>[22.80, 26.89]        | 24.08<br>[21.25, 26.89]             |
| Number of traumatic events    | 0.96<br>[0.47, 1.45]           | 1.19<br>[0.70, 1.68]                |
| Beck Depression Inventory-II  | 4.54<br>[2.66, 6.42]           | 3.38<br>[2.21, 4.56]                |
| State-Trait Anxiety Inventory | 35.04<br>[31.94, 38.14]        | 33.50<br>[30.68, 36.32]             |
| Attention to film             | 9.15<br>[8.72, 9.59]           | 9.12<br>[8.70, 9.53]                |
| Diary compliance              | 8.23<br>[7.81, 8.65]           | 8.31<br>[7.53, 9.08]                |
| Mood rating pre-film          | 5.66<br>[3.33, 7.99]           | 3.86<br>[2.56, 5.15]                |
| Mood rating post-film         | 18.84<br>[14.18, 23.49]        | 14.49<br>[10.78, 18.19]             |
| Post-film distress            | 6.50<br>[5.66, 7.34]           | 5.81<br>[4.72, 6.90]                |
| Visual recognition memory     | 14.27<br>[13.12, 15.42]        | 15.00<br>[14.02, 15.98]             |
| Verbal recognition memory     | 19.38<br>[18.10, 20.67]        | 18.58<br>[17.34, 19.81]             |
| Demand rating                 | - 0.23<br>[-1.43, 0.96]        | -1.27<br>[-2.50, -0.04]             |

*Note.* A composite mood score pre- and post-film was calculated by summing participants ratings on six visual analogue scales; fear, horror, anxiety, sadness, hopelessness and depressed. Visual and verbal recognition memory scores are a sum of correct responses (out of a maximum score of 22 for visual and 32 for verbal recognition memory tests).
