# Supplementary material for: Computer Game Play Reduces Intrusive Memories of Experimental Trauma via Reconsolidation-Update Mechanisms
Source: PubMed Central journal article supplement (PMC4526368; doi:10.1177/0956797615583071), 2015-08
Supplement: DS_10.11770956797615583071_TableS2.pdf [file DS_10.11770956797615583071_TableS2.pdf]

Table S2

*Experiment 2: Baseline characteristics, manipulation checks and recognition memory scores*

|                                  | No-Task<br>Control<br>(n = 18) | Reactivation+<br>Tetris<br>(n = 18) | Tetris-<br>Only<br>(n = 18) | Reactivation-<br>Only<br>(n = 18) |
|----------------------------------|--------------------------------|-------------------------------------|-----------------------------|-----------------------------------|
|                                  | <i>n</i><br>(%)                | <i>n</i><br>(%)                     | <i>n</i><br>(%)             | <i>n</i><br>(%)                   |
|                                  | <i>M</i><br>[95% CI]           | <i>M</i><br>[95% CI]                | <i>M</i><br>[95% CI]        | <i>M</i><br>[95% CI]              |
| Female                           | 14<br>(77.78%)                 | 9<br>(50.00%)                       | 14<br>(77.78%)              | 10<br>(55.56%)                    |
| Age                              | 23.67<br>[20.28, 27.06]        | 25.44<br>[21.77, 29.12]             | 25.39<br>[21.50, 29.28]     | 28.39<br>[22.77, 34.01]           |
| Number of traumatic<br>events    | 1.22<br>[0.33, 2.12]           | 0.78<br>[0.31, 1.25]                | 0.94<br>[0.45, 1.44]        | 1.00<br>[0.58, 1.42]              |
| Beck Depression<br>Inventory-II  | 3.33<br>[1.06, 5.61]           | 2.67<br>[1.45, 3.88]                | 3.61<br>[1.33, 5.89]        | 2.11<br>[0.73, 3.50]              |
| State-Trait Anxiety<br>Inventory | 33.39<br>[28.25, 38.53]        | 34.67<br>[30.92, 38.41]             | 33.94<br>[29.67, 38.22]     | 33.78<br>[29.77, 37.79]           |
| Attention to film                | 9.67<br>[9.43, 9.91]           | 9.28<br>[8.87, 9.69]                | 9.56<br>[9.25, 9.86]        | 9.44<br>[9.14, 9.75]              |
| Diary compliance                 | 8.56<br>[8.13, 8.98]           | 8.17<br>[7.26, 9.07]                | 8.44<br>[7.93, 8.96]        | 8.44<br>[7.99, 8.90]              |
| Mood rating pre-<br>film         | 3.30<br>[2.24, 4.36]           | 4.12<br>[2.64, 5.60]                | 3.93<br>[2.52, 5.33]        | 4.50<br>[2.88, 6.12]              |
| Mood rating post-<br>film        | 15.00<br>[11.07, 18.93]        | 15.78<br>[12.69, 18.87]             | 17.72<br>[12.89, 22.56]     | 15.85<br>[12.24, 19.46]           |
| Post-film distress               | 6.44<br>[5.51, 7.38]           | 6.44<br>[5.61, 7.28]                | 6.11<br>[4.82, 7.40]        | 6.06<br>[4.82, 7.29]              |
| Visual recognition<br>memory     | 15.00<br>[13.96, 16.04]        | 15.67<br>[14.59, 16.75]             | 14.28<br>[13.35, 15.21]     | 14.44<br>[13.40, 15.49]           |
| Verbal recognition<br>memory     | 19.78<br>[18.65, 20.90]        | 18.33<br>[17.41, 19.25]             | 18.83<br>[17.28, 20.39]     | 18.89<br>[17.15, 20.63]           |

|               |                        |                        |                        |                        |
|---------------|------------------------|------------------------|------------------------|------------------------|
| Demand rating | -1.33<br>[-2.79, 0.12] | -1.78<br>[-3.67, 0.11] | -1.61<br>[-3.24, 0.02] | -0.28<br>[-2.16, 1.60] |
|---------------|------------------------|------------------------|------------------------|------------------------|

---

*Note.* A composite mood score pre- and post-film was calculated by summing participants ratings on six visual analogue scales; fear, horror, anxiety, sadness, hopelessness and depressed. Visual and verbal recognition memory scores are a sum of correct responses (out of a maximum score of 22 for visual and 32 for verbal recognition memory tests).
